# Supplementary material
Source: MDPI journal article supplement (https://www.mdpi.com/1999-4907/13/8/1206)
Supplement: s1 [file s1]

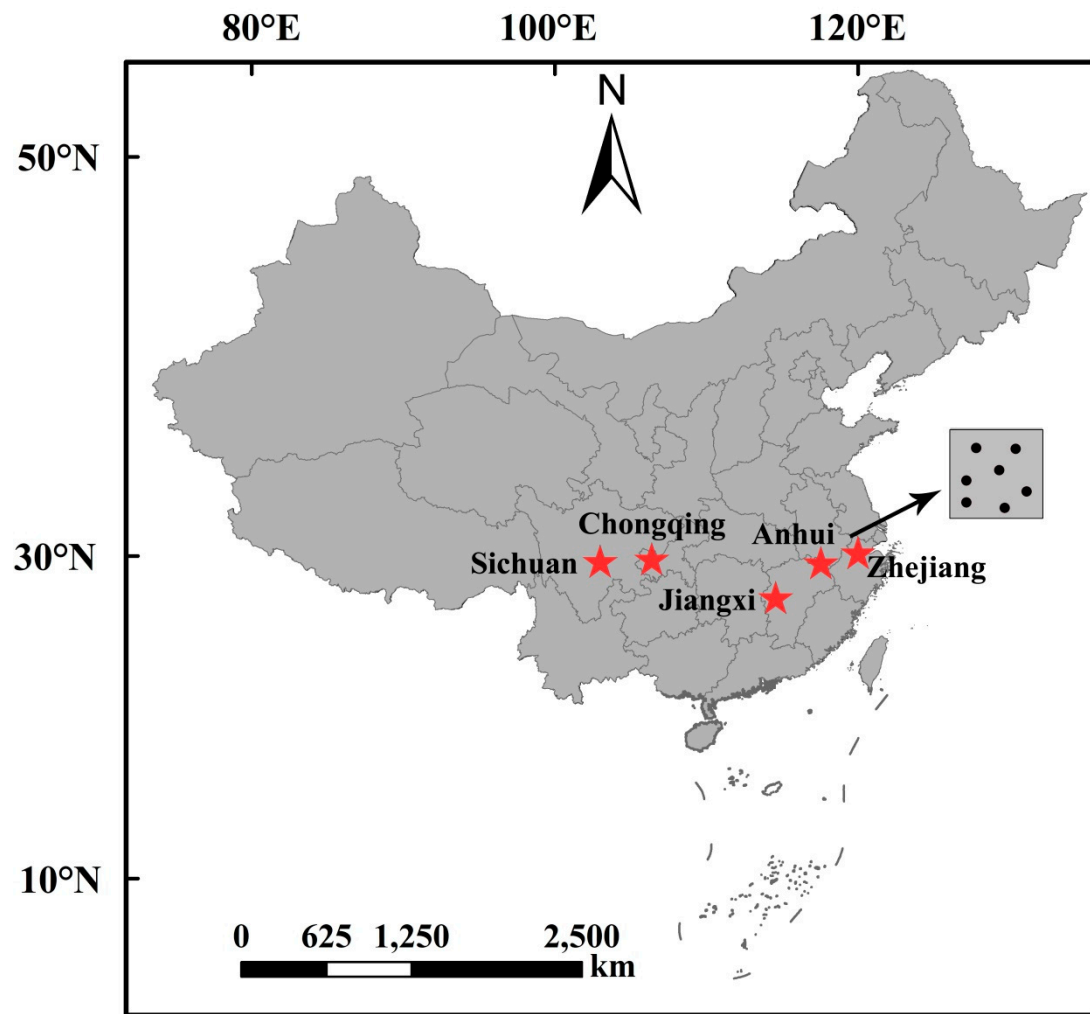

Figure S1. Geographical distribution of the 250 plots. Plots were taken from five forest sites in subtropical China. At each site, 50 plots with an area of 20 m  $\times$  20 m were randomly established.
